# Supplementary material for: Experimental and Theoretical Investigation of External Electric-Field-Induced Crystallization of TKX-50 from Solution by Finite-Temperature String with Order Parameters as Collective Variables for Ionic Crystals
Source: MDPI journal article supplement (doi:10.3390/molecules29051159), 2024-03-05
Supplement: s1 [file s1]

## Supporting Information

# Experimental and Theoretical Investigation of External Electric-Field-Induced Crystallization of TKX-50 from Solution by Finite-Temperature String with Order Parameters as Collective Variables for Ionic Crystals

Fude Ren <sup>1,\*</sup>, Xiaolei Wang <sup>1</sup>, Qing Zhang <sup>1</sup>, Xiaojun Wang <sup>2</sup>, Lingling Chang <sup>1</sup>  
and Zhiteng Zhang <sup>1</sup>

Figure S1 Molecular structure of TKX-50

Table S1 Crystal data and structural parameters of TKX-50 without the external electric field

Table S2 Atomic coordinates and equivalent temperature factor of TKX-50 without the external electric field

Table S3 Selected bond lengths of the TKX-50 without the external electric field

Table S4 Selected bond angles of the TKX-50 without the external electric field

Table S5 Selected dihedral angles of the TKX-50 without the external electric field

Table S6 Crystal data and structural parameters of TKX-50 under the external electric field

Table S7 Atomic coordinates and equivalent temperature factor of TKX-50 under the external electric field

Table S8 Selected bond lengths of the TKX-50 under the external electric field

Table S9 Selected bond angles of the TKX-50 under the external electric field

Table S10 Selected dihedral angles of the TKX-50 under the external electric field

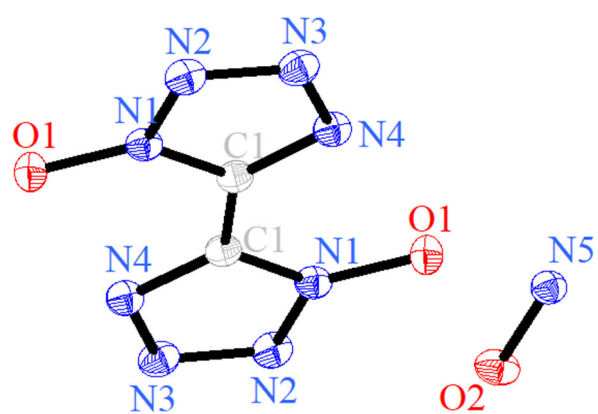

**Figure S1.** Molecular structure of TKX-50

**Table S1** Crystal data and structural parameters of TKX-50 without the external electric field

| Parameter                                   | value                                                        |
|---------------------------------------------|--------------------------------------------------------------|
| Empirical formula                           | C <sub>2</sub> H <sub>8</sub> N <sub>10</sub> O <sub>4</sub> |
| Formula weight                              | 236.18                                                       |
| Temperature / K                             | 150                                                          |
| Crystal system                              | monoclinic                                                   |
| Space group                                 | P2 <sub>1</sub> /c                                           |
| a / Å                                       | 5.4622(2)                                                    |
| b / Å                                       | 11.5757(5)                                                   |
| c / Å                                       | 6.4887(3)                                                    |
| $\alpha$ / °                                | 90                                                           |
| $\beta$ / °                                 | 95.393(2)                                                    |
| $\gamma$ / °                                | 90                                                           |
| Volume / Å <sup>3</sup>                     | 408.46(3)                                                    |
| Z                                           | 2                                                            |
| $\rho_{\text{calc}}$ g / cm <sup>3</sup>    | 1.920                                                        |
| $\mu$ / mm <sup>-1</sup>                    | 0.173                                                        |
| F(000)                                      | 244.0                                                        |
| Crystal size / mm <sup>3</sup>              | 0.16 × 0.09 × 0.08                                           |
| Radiation                                   | MoK $\alpha$ ( $\lambda$ = 0.71073)                          |
| 2 $\Theta$ range for data collection / °    | 7.04 to 52.762                                               |
| Index ranges                                | ? ≤ h ≤ ?, ? ≤ k ≤ ?, ? ≤ l ≤ ?                              |
| Reflections collected                       | 830                                                          |
| Independent reflections                     | 830 [ $R_{\text{int}}$ = ?, $R_{\text{sigma}}$ = 0.0319]     |
| Data/restraints/parameters                  | 830/4/82                                                     |
| Goodness-of-fit on F <sup>2</sup>           | 1.098                                                        |
| Final R indexes [ $I \geq 2\sigma(I)$ ]     | $R_1$ = 0.0405, $wR_2$ = 0.0913                              |
| Final R indexes [all data]                  | $R_1$ = 0.0505, $wR_2$ = 0.0968                              |
| Largest diff. peak/hole / e Å <sup>-3</sup> | 0.29/-0.25                                                   |

**Table S2** Atomic coordinates and equivalent temperature factor of TKX-50 without the external electric field

| Atom | x/10 <sup>4</sup> | y/10 <sup>4</sup> | z/10 <sup>4</sup> | U(eq) /10 <sup>3</sup> |
|------|-------------------|-------------------|-------------------|------------------------|
| O(1) | 2343(2)           | 4122.5(12)        | 1807.6(19)        | 17.6(4)                |
| O(2) | 6136(2)           | 2887.0(12)        | 1092(2)           | 20.2(4)                |
| N(1) | 2383(3)           | 4134.5(14)        | 3852(2)           | 15.5(4)                |
| N(4) | 3279(3)           | 4444.5(14)        | 7137(2)           | 17.2(4)                |
| N(5) | 7668(3)           | 3523.2(14)        | -129(2)           | 15.9(4)                |
| N(2) | 674(3)            | 3593.0(14)        | 4849(3)           | 18.4(4)                |
| N(3) | 1240(3)           | 3781.8(14)        | 6826(3)           | 19.0(4)                |
| C(1) | 3962(3)           | 4658.5(16)        | 5261(3)           | 14.9(4)                |

**Table S3** Selected bond lengths of the TKX-50 without the external electric field

| Atom      | Length/Å | Atom                    | Length/Å |
|-----------|----------|-------------------------|----------|
| O(1)—N(1) | 1.325(2) | N(4)—N(3)               | 1.352(2) |
| O(2)—N(5) | 1.413(2) | N(4)—C(1)               | 1.329(2) |
| N(1)—N(2) | 1.340(2) | N(2)—N(3)               | 1.309(2) |
| N(1)—C(1) | 1.342(2) | C(1)—C(1 <sup>1</sup> ) | 1.449(4) |

**Table S4** Selected bond angles of the TKX-50 without the external electric field

| Atom           | Angle / °  |                              | Angle / °  |
|----------------|------------|------------------------------|------------|
| O(1)-N(1)-N(2) | 122.14(15) | N(2)-N(3)-N(4)               | 110.88(15) |
| O(1)-N(1)-C(1) | 129.51(15) | N(1)-C(1)-C(1 <sup>1</sup> ) | 123.7(2)   |
| N(2)-N(1)-C(1) | 108.34(16) | N(4)-C(1)-N(1)               | 108.78(16) |
| C(1)-N(4)-N(3) | 105.50(15) | N(4)-C(1)-C(1 <sup>1</sup> ) | 127.5(2)   |
| N(3)-N(2)-N(1) | 106.50(15) |                              |            |

**Table S5** Selected dihedral angles of the TKX-50 without the external electric field

| Atom                              | Angle/°     | Atom                              | Angle/°   |
|-----------------------------------|-------------|-----------------------------------|-----------|
| O(1)-N(1)-N(2)-N(3)               | -179.55(15) | N(2)-N(1)-C(1)-C(1 <sup>1</sup> ) | -179.2(2) |
| O(1)-N(1)-C(1)-N(4)               | 179.39(16)  | N(3)-N(4)-C(1)-N(1)               | -0.3(2)   |
| O(1)-N(1)-C(1)-C(1 <sup>1</sup> ) | -0.3(3)     | N(3)-N(4)-C(1)-C(1 <sup>1</sup> ) | 179.4(2)  |
| N(1)-N(2)-N(3)-N(4)               | 0.4(2)      | C(1)-N(1)-N(2)-N(3)               | -0.6(19)  |
| N(2)-N(1)-C(1)-N(4)               | 0.5(2)      | C(1)-N(4)-N(3)-N(2)               | -0.1(2)   |

**Table S6** Crystal data and structural parameters of TKX-50 under the external electric field

| Parameter                                   | value                                                        |
|---------------------------------------------|--------------------------------------------------------------|
| Empirical formula                           | C <sub>2</sub> H <sub>8</sub> N <sub>10</sub> O <sub>4</sub> |
| Formula weight                              | 236.18                                                       |
| Temperature / K                             | 150                                                          |
| Crystal system                              | monoclinic                                                   |
| Space group                                 | P2 <sub>1</sub> /c                                           |
| a / Å                                       | 5.4551(3)                                                    |
| b / Å                                       | 11.4229(1)                                                   |
| c / Å                                       | 6.4822(4)                                                    |
| $\alpha$ / °                                | 90                                                           |
| $\beta$ / °                                 | 95.4130(10)                                                  |
| $\gamma$ / °                                | 90                                                           |
| Volume / Å <sup>3</sup>                     | 406.13(3)                                                    |
| Z                                           | 2                                                            |
| $\rho_{\text{calc}}$ g / cm <sup>3</sup>    | 1.933                                                        |
| $\mu$ / mm <sup>-1</sup>                    | 0.174                                                        |
| F(000)                                      | 244.0                                                        |
| Crystal size / mm <sup>3</sup>              | 0.12 × 0.07 × 0.05                                           |
| Radiation                                   | MoK $\alpha$ ( $\lambda$ = 0.71073)                          |
| 2 $\Theta$ range for data collection / °    | 7.042 to 52.718                                              |
| Index ranges                                | ? ≤ h ≤ ?, ? ≤ k ≤ ?, ? ≤ l ≤ ?                              |
| Reflections collected                       | 827                                                          |
| Independent reflections                     | 827 [ $R_{\text{int}}$ = ?, $R_{\text{sigma}}$ = 0.0395]     |
| Data/restraints/parameters                  | 827/4/89                                                     |
| Goodness-of-fit on F <sup>2</sup>           | 1.139                                                        |
| Final R indexes [ $I \geq 2\sigma(I)$ ]     | $R_1 = 0.0450$ , $wR_2 = 0.1073$                             |
| Final R indexes [all data]                  | $R_1 = 0.0569$ , $wR_2 = 0.1143$                             |
| Largest diff. peak/hole / e Å <sup>-3</sup> | 0.30/-0.32                                                   |



**Table S7** Atomic coordinates and equivalent temperature factor of TKX-50 under the external electric field

| Atom | x/ $10^4$ | y/ $10^4$  | z/ $10^4$ | U(eq) / $10^3$ |
|------|-----------|------------|-----------|----------------|
| O(1) | 7656(3)   | 4121.7(15) | 8201(2)   | 16.7(4)        |
| O(2) | 3860(3)   | 2113.2(15) | 3908(3)   | 18.9(4)        |
| N(5) | 2331(4)   | 1476.7(18) | 5129(3)   | 14.9(5)        |
| N(1) | 7618(3)   | 4135.6(17) | 6143(3)   | 14.3(5)        |
| N(4) | 6719(4)   | 4444.9(18) | 2864(3)   | 16.5(5)        |
| N(2) | 9325(4)   | 3589.9(18) | 5154(3)   | 16.7(5)        |
| N(3) | 8755(4)   | 3780.4(18) | 3173(3)   | 17.9(5)        |
| C(1) | 6039(4)   | 4660(2)    | 4742(3)   | 13.8(5)        |

**Table S8** Selected bond lengths of the TKX-50 under the external electric field

| Atom      | Length/Å | Atom                    | Length/Å |
|-----------|----------|-------------------------|----------|
| O(1)—N(1) | 1.333(2) | N(4)—N(3)               | 1.351(3) |
| O(2)—N(5) | 1.412(3) | N(4)—C(1)               | 1.330(3) |
| N(1)—N(2) | 1.339(3) | N(2)—N(3)               | 1.312(3) |
| N(1)—C(1) | 1.338(3) | C(1)—C(1 <sup>1</sup> ) | 1.446(5) |

**Table S9** Selected bond angles of the TKX-50 under the external electric field

| Atom           | Angle / °  |                              | Angle / °  |
|----------------|------------|------------------------------|------------|
| O(1)-N(1)-N(2) | 121.90(18) | N(2)-N(3)-N(4)               | 110.92(19) |
| O(1)-N(1)-C(1) | 129.34(19) | N(1)-C(1)-C(1 <sup>1</sup> ) | 124.0(3)   |
| C(1)-N(1)-N(2) | 108.7(2)   | N(4)-C(1)-N(1)               | 108.7(2)   |
| C(1)-N(4)-N(3) | 105.49(19) | N(4)-C(1)-C(1 <sup>1</sup> ) | 127.3(3)   |
| N(3)-N(2)-N(1) | 106.18(19) |                              |            |

**Table S10** Selected dihedral angles of the TKX-50 under the external electric field

| Atom                              | Angle/°     | Atom                              | Angle/°   |
|-----------------------------------|-------------|-----------------------------------|-----------|
| O(1)-N(1)-N(2)-N(3)               | -179.72(19) | N(2)-N(1)-C(1)-C(1 <sup>1</sup> ) | -179.5(3) |
| O(1)-N(1)-C(1)-N(4)               | 179.6(2)    | N(3)-N(4)-C(1)-N(1)               | -0.2(2)   |
| O(1)-N(1)-C(1)-C(1 <sup>1</sup> ) | -0.3(4)     | N(3)-N(4)-C(1)-C(1 <sup>1</sup> ) | 179.7(3)  |
| N(1)-N(2)-N(3)-N(4)               | 0.4(2)      | C(1)-N(1)-N(2)-N(3)               | -0.5(2)   |
| N(2)-N(1)-C(1)-N(4)               | 0.4(3)      | C(1)-N(4)-N(3)-N(2)               | -0.1(3)   |
